# Supplementary material for: Assessing the Psychometric Properties of the Illness Management and Recovery Scale: A Systematic Review Using the Consensus-Based Standards for the Selection of Health Measurement Instruments (COSMIN)
Source: MDPI journal article supplement (doi:10.3390/bs14040340), 2024-04-18
Supplement: s1 [file s1]

**Table S1. Methodological quality of assessments of the measurement properties of the IMR-  
s.**

| Article | Box 2 | Box 3    | Box 4     | Box 6    | Box 7    | Box 9     | Box 10     |
|---------|-------|----------|-----------|----------|----------|-----------|------------|
| [21]    | NR    | NR       | NR        | NR       | NR       | Adequate  | NR         |
| [33]    | NR    | NR       | NR        | NR       | NR       | NR        | Doubtful   |
| [37]    | NR    | NR       | NR        | NR       | NR       | NR        | Inadequate |
| [59]    | NR    | NR       | NR        | NR       | Adequate | Adequate  | Inadequate |
| [4]     | NR    | NR       | NR        | NR       | NR       | NR        | Inadequate |
| [28]    | NR    | NR       | NR        | NR       | NR       | NR        | Doubtful   |
| [29]    | NR    | NR       | NR        | NR       | NR       | NR        | Inadequate |
| [67]    | NR    | NR       | NR        | NR       | NR       | NR        | Inadequate |
| [31]    | NR    | NR       | Very good | NR       | NR       | NR        | Doubtful   |
| [66]    | NR    | NR       | NR        | NR       | NR       | NR        | Inadequate |
| [18]    | NR    | NR       | Very good | NR       | NR       | NR        | Doubtful   |
| [20]    | NR    | NR       | NR        | NR       | NR       | NR        | Doubtful   |
| [32]    | NR    | NR       | Very good | Adequate | NR       | Very good | NR         |
| [35]    | NR    | NR       | NR        | NR       | NR       | NR        | Inadequate |
| [34]    | NR    | NR       | NR        | NR       | NR       | NR        | Inadequate |
| [36]    | NR    | NR       | Very good | NR       | NR       | Very good | NR         |
| [25]    | NR    | NR       | NR        | NR       | NR       | NR        | Inadequate |
| [45]    | NR    | NR       | NR        | NR       | NR       | NR        | Doubtful   |
| [38]    | NR    | NR       | Very good | NR       | NR       | NR        | Doubtful   |
| [39]    | NR    | NR       | Very good | NR       | NR       | NR        | Inadequate |
| [41]    | NR    | NR       | NR        | NR       | NR       | NR        | Inadequate |
| [30]    | NR    | NR       | Very good | Adequate | NR       | Very good | NR         |
| [15]    | NR    | Adequate | Very good | NR       | NR       | Adequate  | NR         |
| [50]    | NR    | NR       | Very good | NR       | NR       | NR        | Inadequate |
| [42]    | NR    | NR       | NR        | NR       | NR       | NR        | Doubtful   |
| [44]    | NR    | NR       | NR        | NR       | NR       | Very good | NR         |
| [16]    | NR    | NR       | NR        | NR       | NR       | NR        | Doubtful   |
| [43]    | NR    | NR       | Very good | NR       | NR       | Doubtful  | NR         |
| [47]    | NR    | NR       | NR        | NR       | NR       | Doubtful  | NR         |

**Table S1. Methodological quality of assessments of the measurement properties of the IMRs.**

|      |          |           |           |          |    |           |            |
|------|----------|-----------|-----------|----------|----|-----------|------------|
| [46] | NR       | NR        | Very good | NR       | NR | Very good | NR         |
| [53] | NR       | Very good | Doubtful  | NR       | NR | NR        | NR         |
| [49] | NR       | NR        | Very good | NR       | NR | NR        | Inadequate |
| [51] | NR       | NR        | NR        | NR       | NR | NR        | Inadequate |
| [6]  | NR       | NR        | Very good | NR       | NR | NR        | Inadequate |
| [27] | Doubtful | NR        | Very good | Adequate | NR | NR        | NR         |
| [52] | NR       | NR        | Very good | NR       | NR | NR        | Doubtful   |
| [54] | NR       | NR        | NR        | NR       | NR | NR        | Inadequate |
| [19] | NR       | NR        | NR        | NR       | NR | NR        | Inadequate |
| [3]  | NR       | NR        | NR        | NR       | NR | NR        | Inadequate |
| [55] | NR       | NR        | NR        | NR       | NR | Adequate  | NR         |
| [56] | NR       | NR        | Very good | Adequate | NR | Very good | NR         |
| [57] | NR       | NR        | NR        | NR       | NR | NR        | Inadequate |
| [17] | NR       | NR        | NR        | NR       | NR | NR        | Inadequate |
| [26] | NR       | Very good | Very good | NR       | NR | Very good | NR         |
| [40] | NR       | NR        | Doubtful  | NR       | NR | NR        | Doubtful   |
| [58] | NR       | NR        | Very good | NR       | NR | Very good | NR         |
